# Supplementary material for: NMR Characterization of the Interaction of the Endonuclease Domain of MutL with Divalent Metal Ions and ATP
Source: PubMed Central journal article supplement (PMC4047009; doi:10.1371/journal.pone.0098554), 2014-06-05

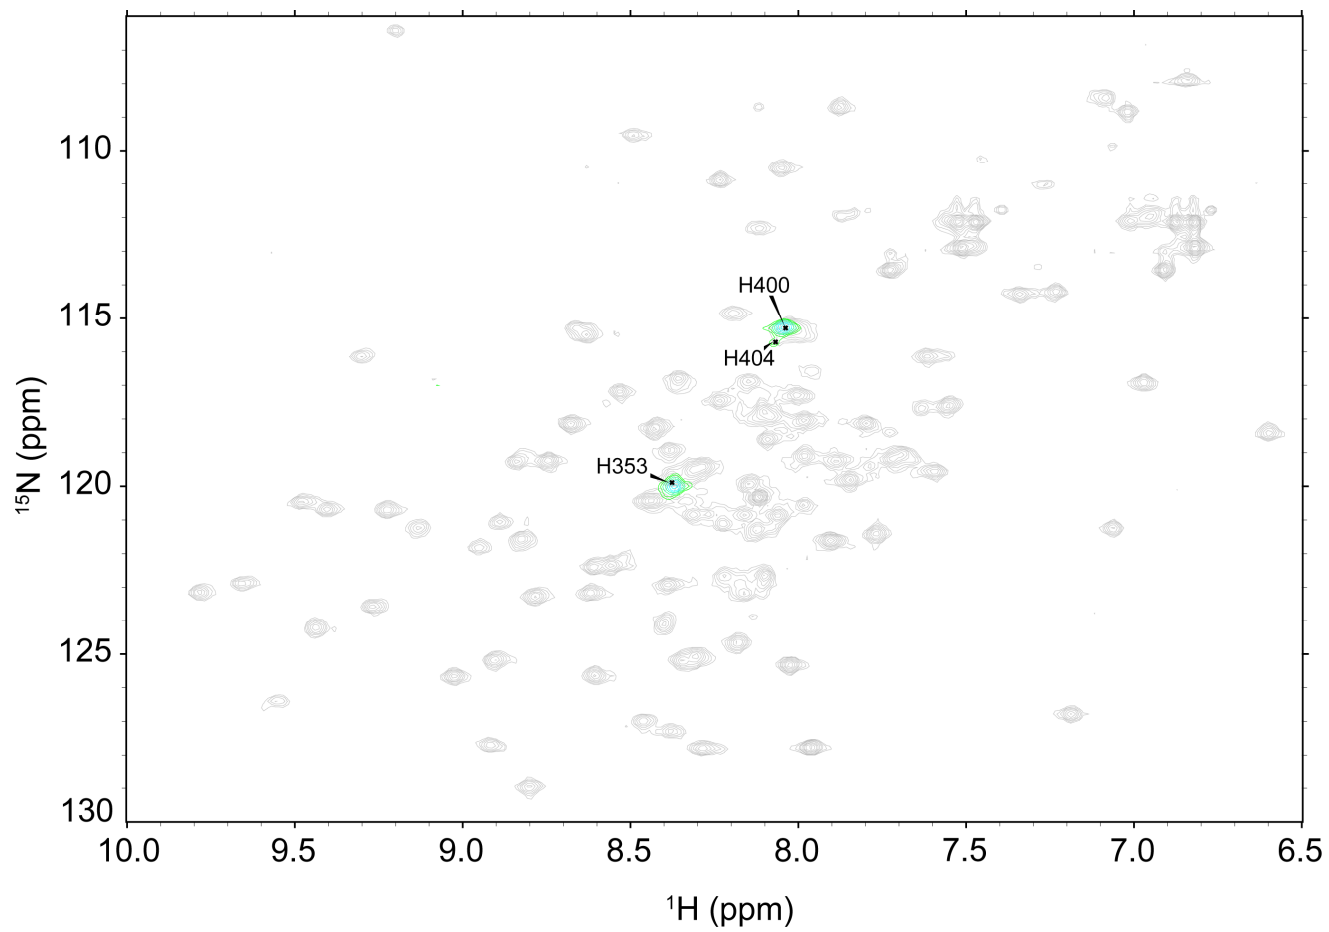

Supplement: pone.0098554.s002.pdf [file pone.0098554.s002.pdf]
