# Supplementary material for: NMR Characterization of the Interaction of the Endonuclease Domain of MutL with Divalent Metal Ions and ATP
Source: PubMed Central journal article supplement (PMC4047009; doi:10.1371/journal.pone.0098554), 2014-06-05
Supplement: pone.0098554.s005.pdf [file pone.0098554.s005.pdf]

CLUSTAL 2.1 multiple sequence alignment

```

bsMutL_CTD      -----GAMDRVPIMYPIGQMHGTYILAQNENGLYIIDQHAAQER
ngMutL_CTD      TMGSSHHHHHSSGLVPRGSHSQSELPLGFIAQLLGIYILAQAEDSLLIIDMHAAAER
aqMutL_CTD      -----PLSQPVKTYKPTYEILGQMDETFILVKDSEYL YFVDQHLLLEER
hPMS2_CTD       -----IGQFNLGFIITKLNEDIFIVDQHATDEK
                ::* :   :*:::  : : : ::* *  *:
    
```

```

bsMutL_CTD      IKYEYFR-EKVGVEPEVQEMIVPLTFHYSTNEALIEQHKQELESVGVFLESFGSNSYI
ngMutL_CTD      VNYEKMKRQRQENGLQSQHLLIPVTF AASHEECAALADHAETLAGFGLSDMGNTLA
aqMutL_CTD      INYEKLL365-----
hPMS2_CTD       YNFEMLQQHTVLQGQRLIAPQTLNLTAVNEAVLIENLEIFRKNGFDFVIDENAPVTERAK
                ::*  ::
    
```

```

bsMutL_CTD      VRCHPAWFPKGEEAELIEEIIQVLDLDS-KNIDIKKLREEAAIMMSCKGSIKANRHLRNDL
ngMutL_CTD      VRAAPVMLGKSDVVSLARDVLGELAQVGSSTIASHENRILATMSCHGSIIRAGRRLTLPE
aqMutL_CTD      -----DENLACRISVKAGQKLSEEK366
hPMS2_CTD       LISLPTSKNWTFGPQDVDELIFMLSDSPGVMCRPSRVKQMFASRACRKSVMIGTALNTSE
                :*: * : . *  :
    
```

```

bsMutL_CTD      IKALLDDL RSTSDPFTCPHGRPIIIHHSTYEMEKMFKRVM
ngMutL_CTD      MNALLRDMEN TPRSNCNHGRPTWVKLTLKELDTLFLRGQ
aqMutL_CTD      IRELIKTWRNLENPHVCPHGRPIYYKIPLREIYEKVG RNY
hPMS2_CTD       MKKLITHMGEMDHPWNCNHGRPTMRHIANLGVISQN----
                :. *: . . * **** : . :
    
```
